# Supplementary material for: Towards an Evidence-Based Recommendation for a Balanced Breakfast—A Proposal from the International Breakfast Research Initiative
Source: MDPI journal article supplement (doi:10.3390/nu10101540), 2018-10-18
Supplement: s1 [file s1]

# **Towards an evidence-based recommendation for a balanced breakfast - a proposal from the International Breakfast Research Initiative**

## **Supplementary materials**

Figure S1. Macronutrient profiles of breakfast and daily intakes, by age group

Figure S2. Contribution of breakfast to daily intakes, by age group

Table S1. Trends for nutritional intakes at breakfast across tertiles of NRF

Table S2. Average daily nutrient intakes expressed as %energy (%en) or % daily recommended value (DRV)

Figure S3. Governing Principles document signed by all authors not employees of CPW SA or General Mills Inc.

Figure S1 – Macronutrient profiles of breakfast and daily intakes.

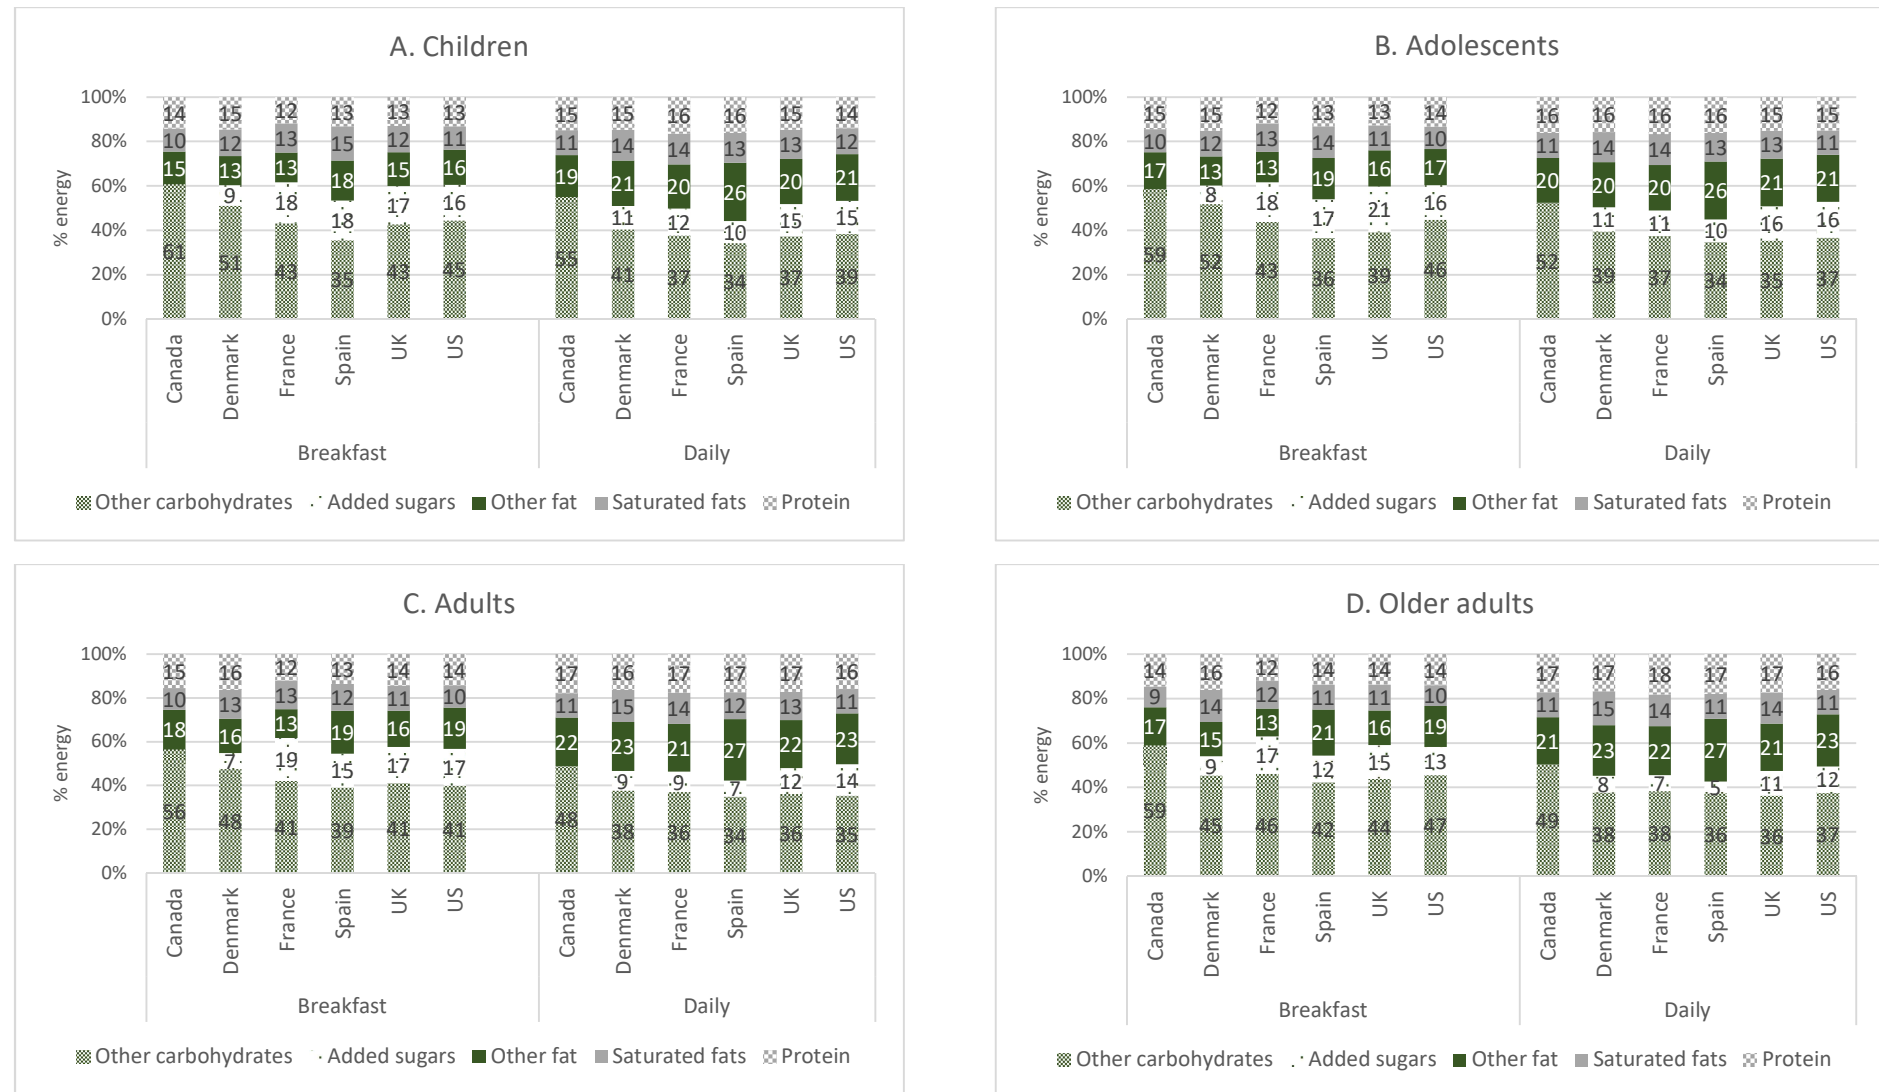

Added sugar data was not available in the Canadian food composition table; thus “Other carbohydrates” represent total carbohydrates.

Figure S2 - % contribution of breakfast to daily intakes

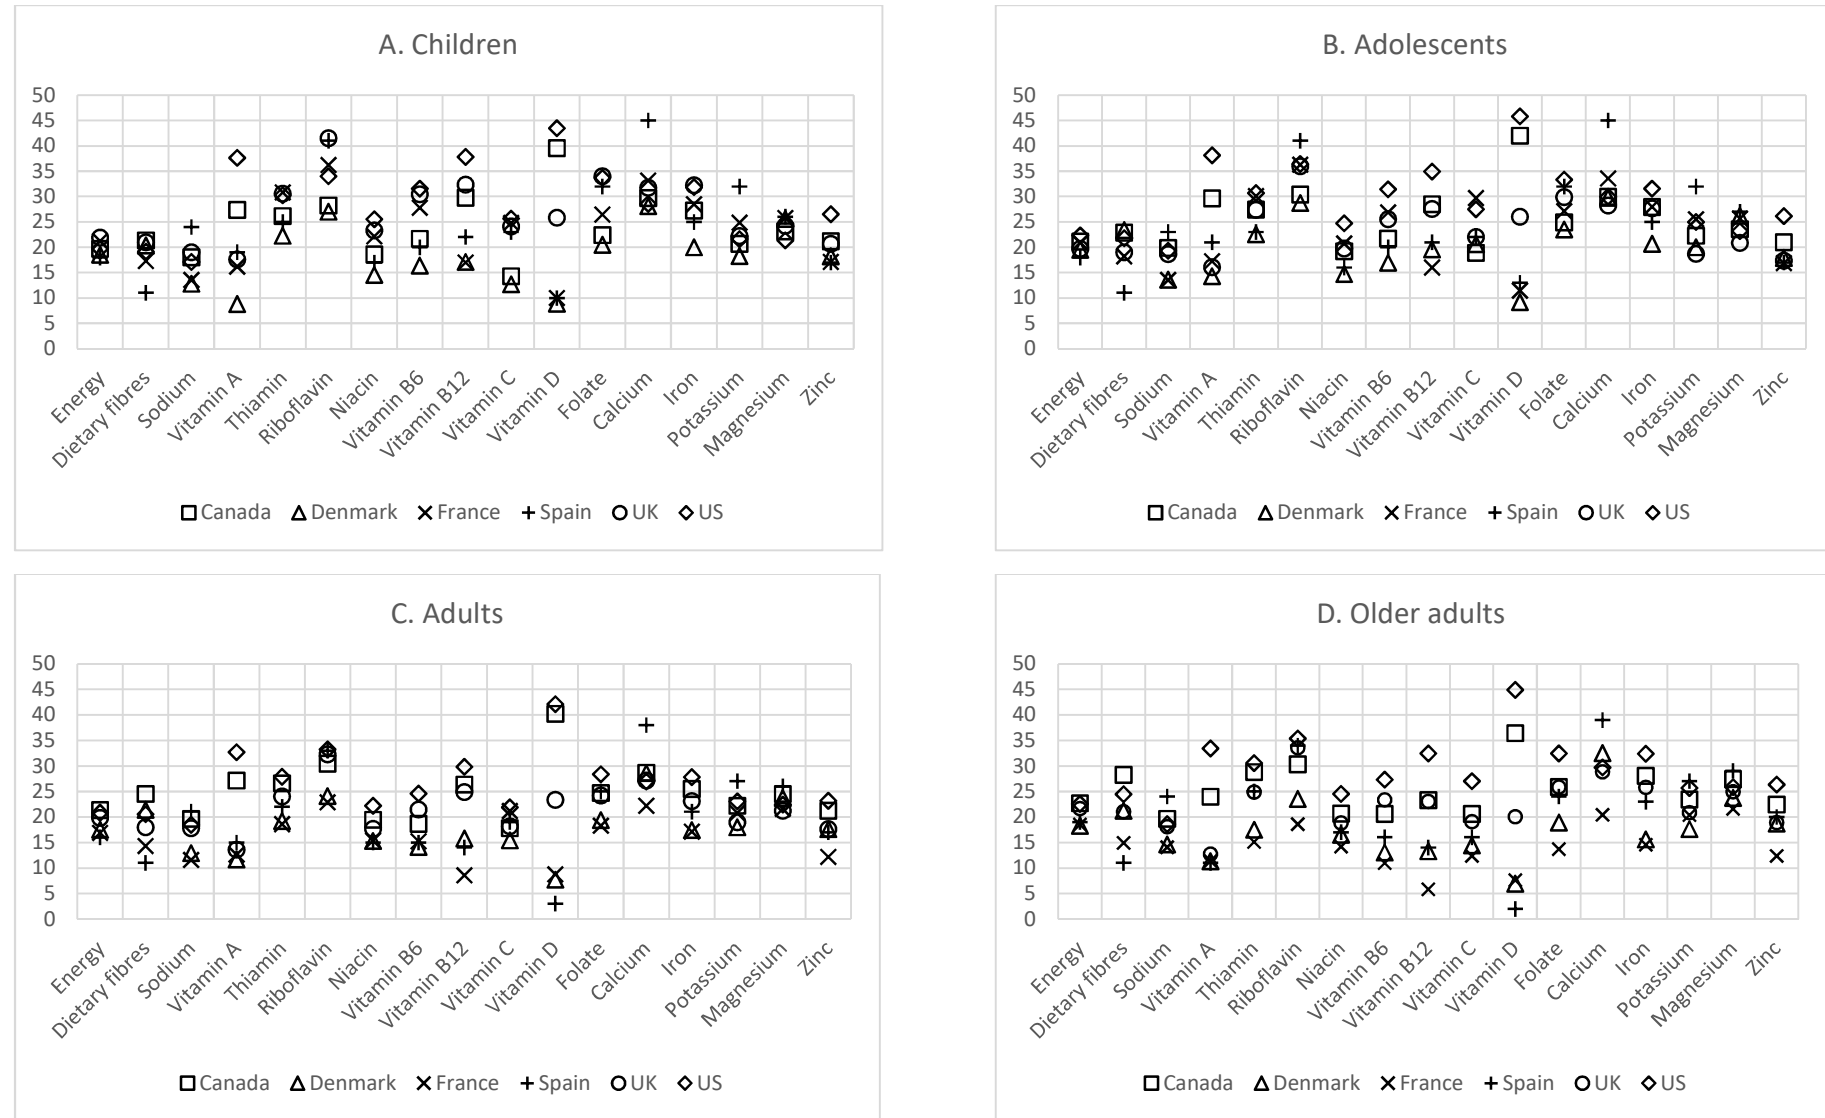

Towards an evidence-based recommendation for a balanced breakfast – Supplements.

Table S1. Trends for nutritional intakes at breakfast across tertiles of NRF

| Nutrient            | Children and adolescents (6-17 years) |         |        |       |                 |      | Adults (18+ years) |         |        |       |                 |      |
|---------------------|---------------------------------------|---------|--------|-------|-----------------|------|--------------------|---------|--------|-------|-----------------|------|
|                     | Canada                                | Denmark | France | Spain | UK <sup>1</sup> | US   | Canada             | Denmark | France | Spain | UK <sup>1</sup> | US   |
| Energy              | -                                     | D***    | -      | -     | -               | D*** | -                  | D***    | -      | -     | D*              | D*** |
| Total carbohydrates | U**                                   | U***    | -      | U*    | U***            | U*** | U***               | U***    | -      | U***  | U***            | U*** |
| Added sugars        | n/a                                   | D***    | D***   | D***  | D***            | D*** | n/a                | D***    | D***   | D***  | D***            | D*** |
| Total Fat           | -                                     | D***    | -      | D***  | D***            | D*** | D***               | D***    | D**    | D***  | D***            | D*** |
| Sat Fat             | -                                     | D***    | -      | D***  | D***            | D**  | D***               | D***    | D***   | D***  | D***            | D*** |
| Protein             | -                                     | U***    | U***   | U*    | U***            | U*** | U*                 | U***    | -      | U***  | U***            | U*** |
| Fiber               | U***                                  | U***    | U***   | U***  | U***            | U*** | U***               | U***    | U***   | U***  | U***            | U*** |
| Sodium              | D*                                    | D***    | U***   | -     | D***            | D*** | D***               | D***    | -      | -     | D***            | D*** |
| Vitamin A           | U**                                   | D***    | U***   | U*    | U***            | U*** | U***               | D***    | -      | -     | -               | U*** |
| Thiamin             | U***                                  | U***    | U***   | U***  | U***            | U*** | U***               | U***    | U***   | U***  | U***            | U*** |
| Riboflavin          | U***                                  | U***    | U***   | U***  | U***            | U*** | U***               | U***    | U***   | U***  | U***            | U*** |
| Niacin              | -                                     | U***    | U***   | U***  | U***            | U*** | U*                 | U***    | U***   | U***  | U***            | U*** |
| Vitamin B6          | U***                                  | U***    | U***   | U***  | U***            | U*** | U***               | U***    | U***   | U***  | U***            | U*** |
| Vitamin B12         | U***                                  | U***    | U***   | U***  | U***            | U*** | U***               | -       | U***   | U***  | U***            | U*** |
| Vitamin C           | U*                                    | U***    | U**    | U***  | U***            | U*** | U***               | U***    | U***   | U***  | U***            | U*** |
| Vitamin D           | U***                                  | -       | -      | U***  | U***            | U*** | U***               | U***    | -      | -     | U***            | U*** |
| Folate              | -                                     | U***    | U***   | U***  | U***            | U*** | -                  | U***    | U***   | U***  | U***            | U*** |
| Calcium             | U***                                  | U***    | U***   | U***  | U***            | U*** | U***               | U***    | U***   | U***  | U***            | U*** |
| Iron                | U***                                  | U***    | U***   | U***  | U***            | U*** | U***               | U***    | U***   | U***  | U***            | U*** |
| Potassium           | U***                                  | U***    | U***   | U***  | U***            | U*** | U***               | U***    | U***   | U***  | U***            | U*** |
| Magnesium           | U***                                  | U***    | U***   | U***  | U***            | U*** | U***               | U***    | U***   | U***  | U***            | U*** |
| Zinc                | U***                                  | U***    | U***   | U*    | U***            | U*** | U***               | U***    | U***   | U***  | U***            | U*** |

NRF: Nutrient Rich Food Index [28]; U: Upwards trend (positive association); D: downwards trend (negative association); -: no trend; p-values for fully-adjusted models: \*p<0.1, \*\*p<0.05, \*\*\*p<0.01

<sup>1</sup> Age ranges in the UK data: 5-18 years and 19+ years.

Table S2. Average daily nutrient intakes expressed as %energy (%en) or % daily recommended value (DRV)<sup>1</sup>

|                           | DRV <sup>1</sup> | Canada   |             |        |              | Denmark  |             |        |         | France   |             |        |              |
|---------------------------|------------------|----------|-------------|--------|--------------|----------|-------------|--------|---------|----------|-------------|--------|--------------|
|                           |                  | Children | Adolescents | Adults | Older adults | Children | Adolescents | Adults | Elderly | Children | Adolescents | Adults | Older adults |
| Energy (kcal)             |                  | 1848     | 2065        | 1958   | 1733         | 2069     | 2161        | 2397   | 2294    | 1656     | 1935        | 1892   | 1862         |
| Total Carbohydrates       | 50-70%en         | 54.9     | 52.1        | 47.4   | 48.3         | 51.0     | 50.4        | 46.6   | 45.3    | 49.2     | 47.9        | 45.2   | 45.4         |
| Added sugars <sup>2</sup> | <10%en           |          |             |        |              | 10.5     | 11.1        | 8.9    | 7.5     | 12.0     | 11.3        | 9.1    | 7.2          |
| Total Fats                | <30%en           | 30.2     | 31.7        | 32.5   | 31.6         | 34.3     | 33.9        | 37.1   | 38.0    | 33.5     | 33.6        | 35.1   | 36.2         |
| Saturated Fats            | <10%en           | 10.9     | 10.9        | 10.5   | 10.3         | 13.8     | 13.7        | 14.6   | 15.3    | 13.8     | 13.5        | 13.8   | 14.2         |
| Protein                   | 50g              | 137      | 164         | 168    | 143          | 152      | 170         | 195    | 192     | 134      | 161         | 166    | 168          |
| Fibre                     | 25g              | 63       | 66          | 68     | 69           | 79       | 75          | 90     | 92      | 53       | 61          | 64     | 64           |
| Sodium                    | 2000mg           | 129      | 146         | 144    | 125          | 161      | 177         | 197    | 182     | 112      | 130         | 146    | 1            |
| Vitamin A                 | 800mg            | 74       | 81          | 79     | 81           | 149      | 122         | 124    | 172     | 69       | 77          | 94     | 128          |
| Thiamin (B1)              | 1.2mg            | 135      | 149         | 136    | 123          | 108      | 108         | 117    | 117     | 88       | 100         | 92     | 89           |
| Riboflavin (B2)           | 1.2mg            | 151      | 164         | 164    | 150          | 133      | 142         | 150    | 150     | 125      | 140         | 128    | 131          |
| Niacin (B3)               | 15mg             | 215      | 266         | 277    | 236          | 159      | 181         | 233    | 235     | 93       | 113         | 120    | 115          |
| Vitamin B6                | 1.3mg            | 107      | 126         | 135    | 119          | 100      | 108         | 131    | 123     | 113      | 130         | 121    | 123          |
| Vitamin B12               | 2.4mcg           | 156      | 172         | 173    | 159          | 225      | 221         | 275    | 308     | 154      | 181         | 205    | 277          |
| Vitamin C                 | 100mg            | 116      | 116         | 101    | 93           | 103      | 94          | 114    | 117     | 78       | 83          | 79     | 99           |
| Vitamin D                 | 5mcg             | 105      | 110         | 92     | 97           | 54       | 58          | 78     | 114     | 34       | 41          | 50     | 51           |
| Folate                    | 400mcg           | 111      | 122         | 117    | 99           | 72       | 71          | 89     | 88      | 54       | 61          | 61     | 69           |
| Calcium                   | 1000mg           | 93       | 98          | 81     | 73           | 105      | 108         | 116    | 107     | 84       | 93          | 90     | 94           |
| Iron                      | 14mg             | 89       | 97          | 90     | 84           | 68       | 70          | 84     | 82      | 72       | 84          | 82     | 86           |
| Potassium                 | 3500mg           | 68       | 74          | 77     | 76           | 79       | 82          | 31     | 105     | 63       | 71          | 78     | 85           |
| Magnesium                 | 310mg            | 81       | 94          | 101    | 96           | 97       | 101         | 40     | 123     | 75       | 86          | 99     | 103          |
| Zinc                      | 11mg             | 82       | 98          | 99     | 89           | 92       | 102         | 40     | 110     | 71       | 84          | 87     | 91           |

<sup>1</sup> Total carbohydrates, added sugars, total fats and saturated fats expressed as % energy, following WHO guidelines [34,35]; all other nutrients expressed as % DRV, following CODEX Nutrient reference values [33].

<sup>2</sup> Added sugars data was not available for Canada.

Age groups were defined as follow: Children (6-12y, except Spain 9-12y and UK 5-12y); Adolescents (13-17y, except UK 13-18y); Younger adults (18-54y, except UK 19-64y); Older adults (55+y, except UK 65+y)

Table S1 (Continued). Average daily nutrient intakes expressed as %energy (%en) or % daily recommended value (DRV)<sup>1</sup>

|                     | DRV <sup>1</sup> | Spain    |             |        |         | UK       |             |        |         | US       |             |        |         |
|---------------------|------------------|----------|-------------|--------|---------|----------|-------------|--------|---------|----------|-------------|--------|---------|
|                     |                  | Children | Adolescents | Adults | Elderly | Children | Adolescents | Adults | Elderly | Children | Adolescents | Adults | Elderly |
| Energy (kcal)       |                  | 1936     | 1989        | 1782   | 1591    | 1593     | 1797        | 1719   | 1599    | 1977     | 2092        | 2359   | 1979    |
| Total Carbohydrates | 50-70%en         | 43.6     | 44.4        | 40.6   | 40.6    | 51.8     | 50.9        | 48.0   | 47.4    | 53.9     | 53.5        | 48.9   | 48.8    |
| Added sugars        | <10%en           | 9.8      | 10.1        | 7.1    | 5.1     | 14.6     | 15.6        | 11.9   | 11.1    | 15.1     | 16.4        | 14.1   | 11.7    |
| Total Fats          | <30%en           | 39.1     | 38.3        | 38.8   | 37.5    | 33.5     | 33.9        | 34.7   | 35.1    | 33.0     | 32.5        | 33.7   | 34.0    |
| Saturated Fats      | <10%en           | 13.2     | 12.6        | 11.8   | 10.7    | 13.1     | 12.5        | 12.8   | 13.8    | 11.8     | 11.1        | 10.8   | 10.8    |
| Protein             | 50g              | 153      | 157         | 147    | 133     | 115      | 134         | 145    | 136     | 140      | 159         | 182    | 153     |
| Fibre               | 25g              | 46       | 45          | 48     | 56      | 59       | 63          | 72     | 71      | 59       | 61          | 75     | 72      |
| Sodium              | 2000mg           | 77       | 79          | 69     | 59      | 95       | 112         | 110    | 100     | 155      | 174         | 193    | 162     |
| Vitamin A           | 800mg            | 34       | 30          | 30     | 28      | 78       | 81          | 113    | 146     | 83       | 78          | 87     | 92      |
| Thiamin (B1)        | 1.2mg            | 68       | 71          | 63     | 56      | 110      | 117         | 118    | 117     | 136      | 144         | 150    | 132     |
| Riboflavin (B2)     | 1.2mg            | 94       | 88          | 82     | 78      | 125      | 121         | 129    | 135     | 173      | 178         | 199    | 179     |
| Niacin (B3)         | 15mg             | 137      | 146         | 140    | 121     | 183      | 222         | 234    | 209     | 146      | 166         | 194    | 160     |
| Vitamin B6          | 1.3mg            | 73       | 75          | 72     | 69      | 135      | 159         | 162    | 151     | 137      | 152         | 189    | 158     |
| Vitamin B12         | 2.4mcg           | 124      | 115         | 126    | 123     | 170      | 176         | 210    | 249     | 212      | 224         | 236    | 217     |
| Vitamin C           | 100mg            | 25       | 22          | 28     | 35      | 84       | 78          | 79     | 77      | 80       | 72          | 85     | 88      |
| Vitamin D           | 5mcg             | 22       | 22          | 28     | 28      | 41       | 44          | 56     | 66      | 122      | 118         | 102    | 100     |
| Folate              | 400mcg           | 23       | 22          | 21     | 21      | 49       | 53          | 62     | 61      | 138      | 144         | 152    | 137     |
| Calcium             | 1000mg           | 63       | 58          | 49     | 47      | 81       | 78          | 80     | 81      | 111      | 112         | 108    | 93      |
| iron                | 14mg             | 51       | 51          | 48     | 45      | 63       | 69          | 74     | 70      | 106      | 111         | 118    | 108     |
| Potassium           | 3500mg           | 45       | 43          | 42     | 43      | 63       | 67          | 78     | 78      | 65       | 68          | 82     | 79      |
| Magnesium           | 310mg            | 47       | 46          | 46     | 45      | 63       | 68          | 81     | 76      | 78       | 84          | 107    | 99      |
| Zinc                | 11mg             | 55       | 57          | 55     | 49      | 60       | 68          | 76     | 74      | 94       | 102         | 113    | 99      |

<sup>1</sup> Total carbohydrates, added sugars, total fats and saturated fats expressed as % energy, following WHO guidelines [34,35]; all other nutrients expressed as % DRV, following CODEX Nutrient reference values [33].

Age groups were defined as follow: Children (6-12y, except Spain 9-12y and UK 5-12y); Adolescents (13-17y, except UK 13-18y); Younger adults (18-54y, except UK 19-64y); Older adults (55+y, except UK 65+y)

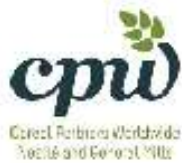

## Governing Principles

You, \_\_\_\_\_ (name), have been engaged by CPW SA based on your topic-expert credentials to participate in research work with the aim to establish a multi-disciplinary expert recommendation on the nutrient and food criteria of a balanced breakfast for European and North American children and adults (the "Project").

The Project is being structured and these governing principles are being issued to ensure the scientific integrity of the Project research work and the resulting publication.

These principles supplement the separate agreement(s) that you have or will enter into to govern your participation in the Project. We kindly ask you to review them carefully and to confirm below that you understand and agree to them.

We, as CPW SA, expect the following governing principles to be respected and adhered to by all participants in the Project for the duration of the Project:

- Participants are expected to provide impartial and objective input throughout the Project.
- Participants are under no obligation to promote or communicate about CPW SA, its products or the breakfast cereal category.
- To the extent a participant makes public statements or other comments (e.g., on social media) regarding CPW SA or its products, he/she shall disclose his/her material connection to the Company.
- All participants will decide on authorship and intellectual input into the scientific paper, but it is anticipated that the paper will be drafted by the Project Chair and Co-Chair with iterative inputs from the other participants. The Project Chair will submit the final paper for publication.
- The resulting publication shall accurately reflect the funding by CPW of the Project. In case a CPW SA employee materially participates in the drafting of the paper, this shall also be accurately reflected.

By signing below, you agree that you understand and agree to be bound by the above governing principles.

Signature: \_\_\_\_\_

Name: \_\_\_\_\_

Place and date: \_\_\_\_\_

Figure S3. Governing Principles document signed by all authors not employees of CPW SA or General Mills Inc.
